# Supplementary material for: Locomotor performance in a running toad: roles of morphology, sex and agrosystem versus natural habitat
Source: Oxford University Press journal article supplement (doi:10.1093/biolinnean/blx147), 2017-11-16
Supplement: blx147_suppl_supplementary_material.docx [file blx147_suppl_supplementary_material.docx]

**Locomotor performance in a running toad: roles of morphology, sex, and agrosystem vs natural habitat**

Francisco Javier Zamora-Camacho

Supplementary Material

**Table S1.** Individual ANOVAs testing the effect of sex, habitat, and their interaction on body mass, snout-vent length, fore and hind limb length, limb ratio, and average speed. Note that fore and hind limb length were controlled for snout-vent length, so degrees of freedom were 1 and 115. *F*-values are indicated. Symbols mean: ns = non-significant; § = marginally non-significant; ***** = *P* < 0.05; ******* = *P* < 0.001. Significant results are in bold.

| **Dependent variables** | **Sex**  ***F*1, 116** | **Habitat**  ***F*1, 116** | **Sex*Habitat**  ***F*1, 116** |
| --- | --- | --- | --- |
| **Body Mass** | 1.080ns | **17.238***** | **4.030*** |
| **Snout-Vent Length** | 0.197ns | **6.859*** | 1.939ns |
| **Fore Limb Length** | **5.539*** | 0.133ns | 3.061§ |
| **Hind Limb Length** | **129.701***** | 0.336ns | **4.395*** |
| **Limb Ratio** | **47.490***** | 0.670ns | 0.310ns |
| **Average Speed** | **18.681***** | 1.342ns | 0.005ns |

**Table S2.** Individual models testing the effects of body mass, snout-vent length, fore and

hind limb length, limb ratio, and run rate on average speed. Sex, habitat, and their interaction were controlled for in all models. *F*- and *β*-values are indicated. Note that the effects of limb length were controlled for snout-vent length, so degrees of freedom were 1 and 114. Symbols mean: ns = non-significant; § = marginally non-significant; ***** = *P* < 0.05; ****** = *P* < 0.01; ******* = *P* < 0.001. Significant results are in bold.

| **Co-variables** | **Co-variable**  ***F*1, 115** | **Co-variable**  ***β*-value** | **Sex**  ***F*1, 115** | **Habitat**  ***F*1, 115** | **Sex*Habitat**  ***F*1, 115** |
| --- | --- | --- | --- | --- | --- |
| **Body Mass** | 0.382ns | 0.059 | **18.957***** | 1.691ns | 0.034ns |
| **Snout-Vent Length** | 1.740ns | 0.117 | **19.241***** | 2.076ns | 0.0.058ns |
| **Fore Limb Length** | 0.250ns | 0.058 | **17.334***** | 2.109ns | 0.025ns |
| **Hind Limb Length** | 2.271ns | 0.247 | 3.712§ | 2.335ns | 0.003ns |
| **Limb Ratio** | 0.757ns | -0.088 | **10.036**** | 1.487ns | 0.014ns |
| **Run Rate** | **134.518***** | **-0.696** | **35.360***** | 1.266ns | 0.723ns |


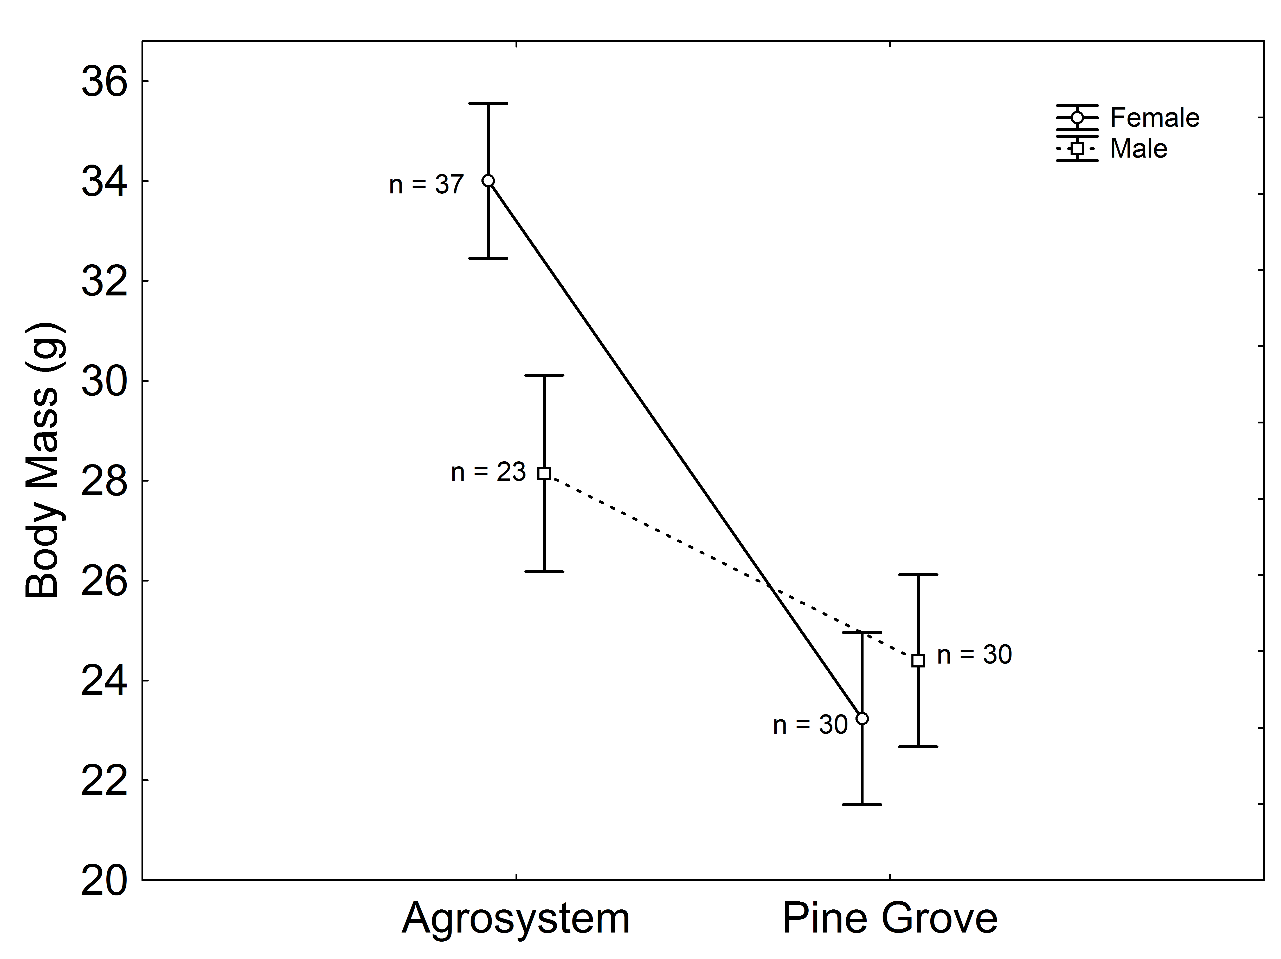


**Fig. S1a**


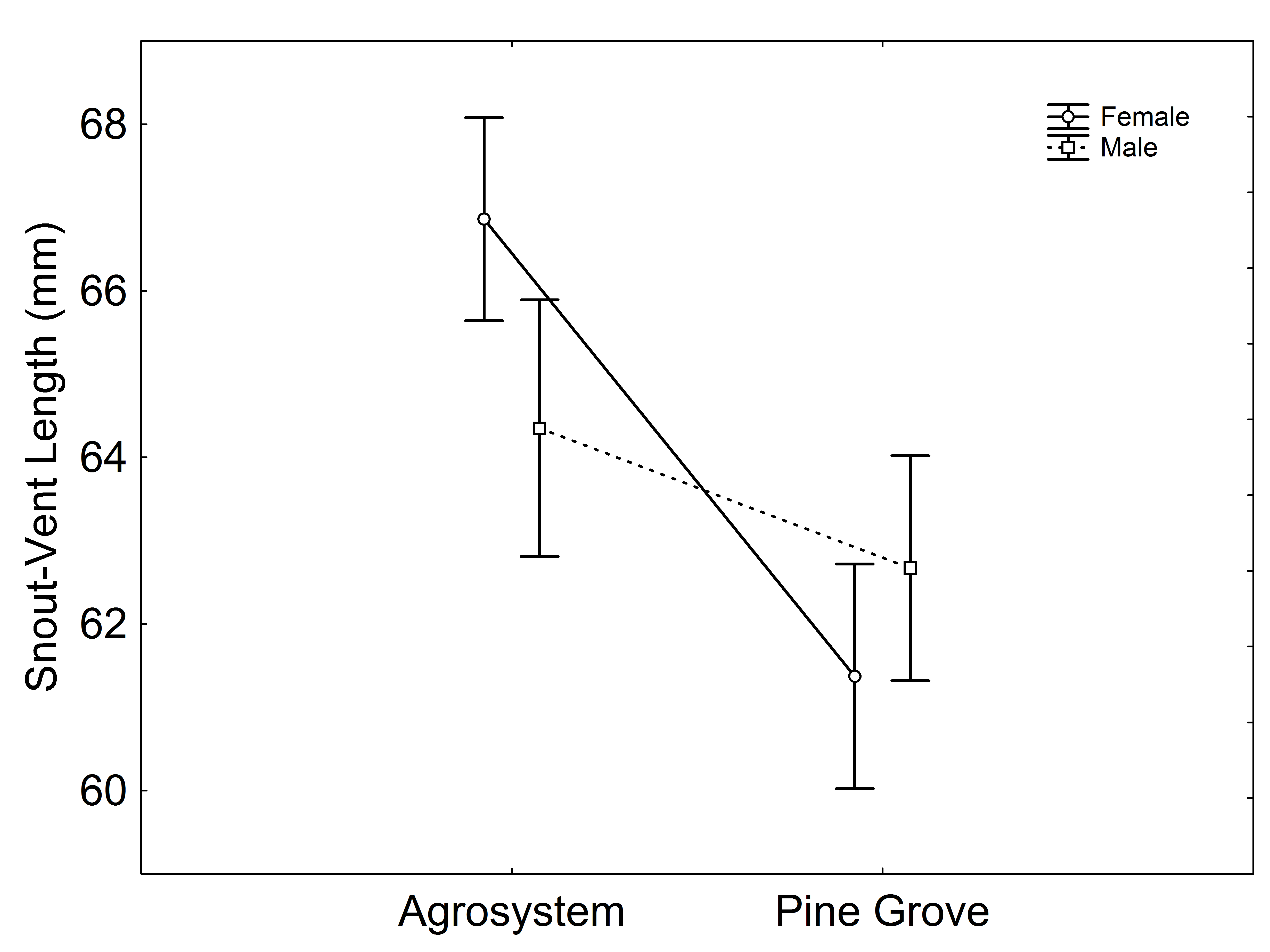


**Fig. S1b**


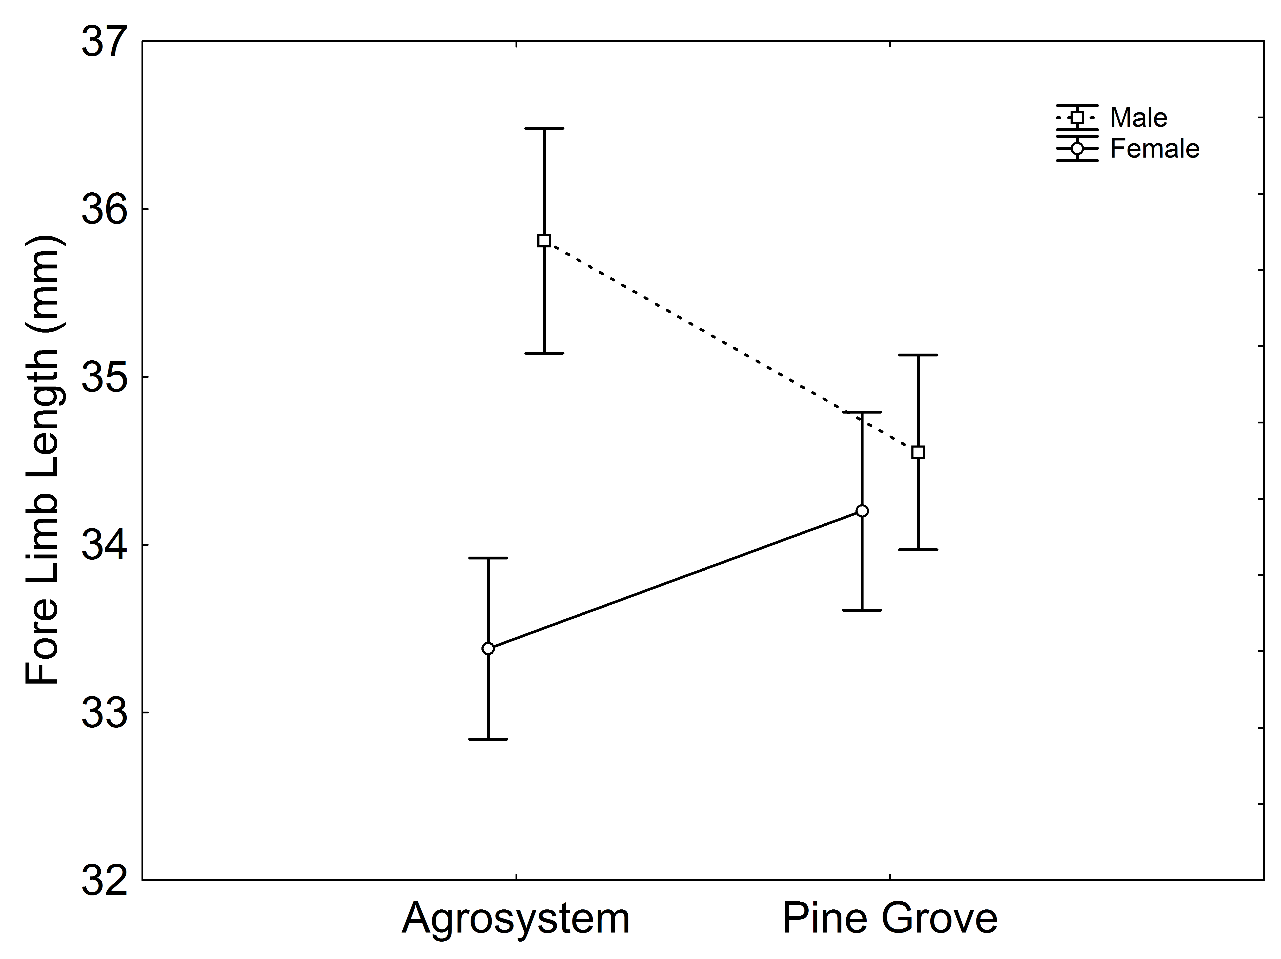


**Fig. S1c**


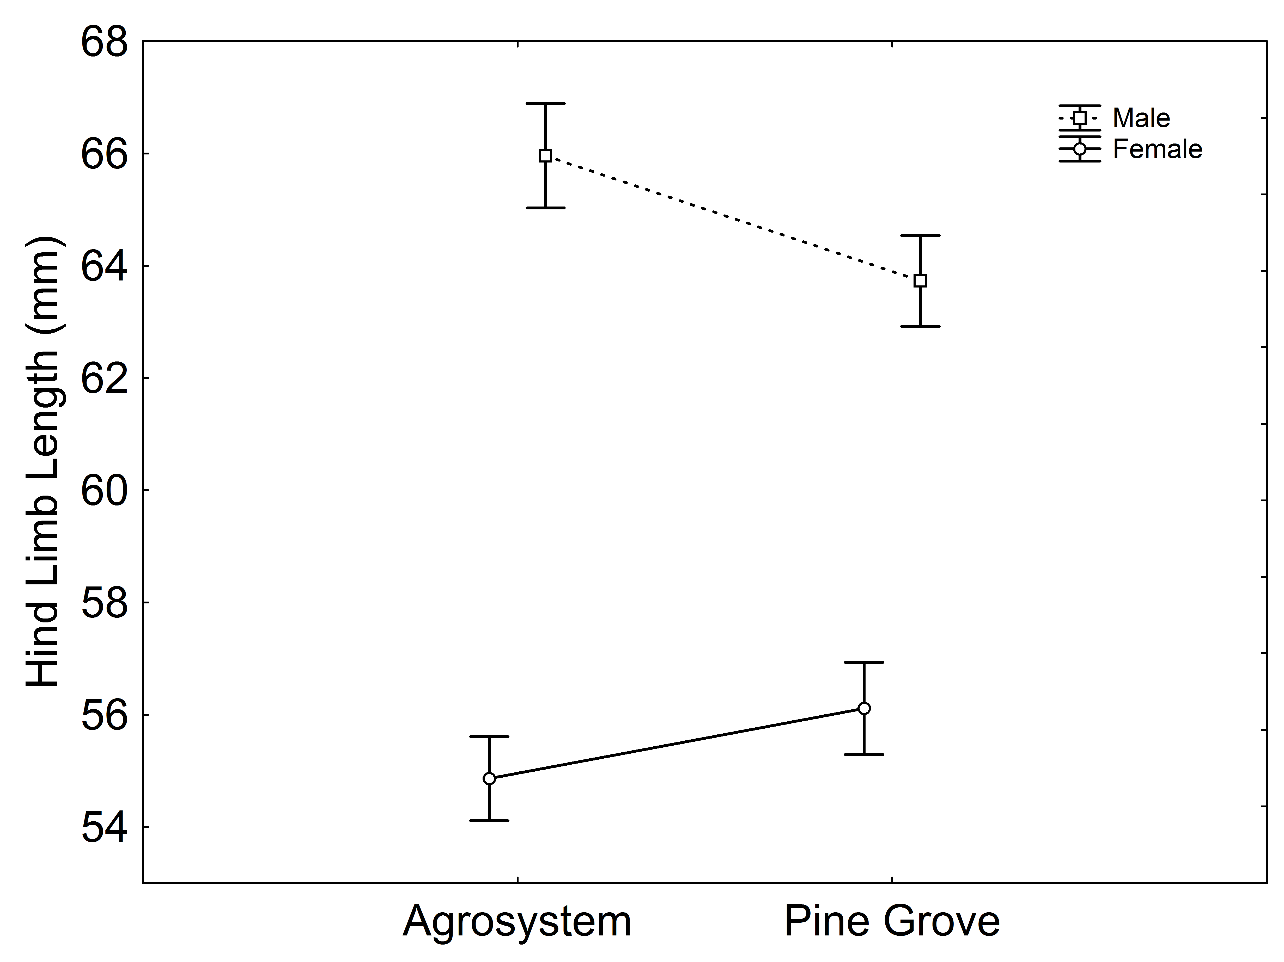


**Fig. S1d**


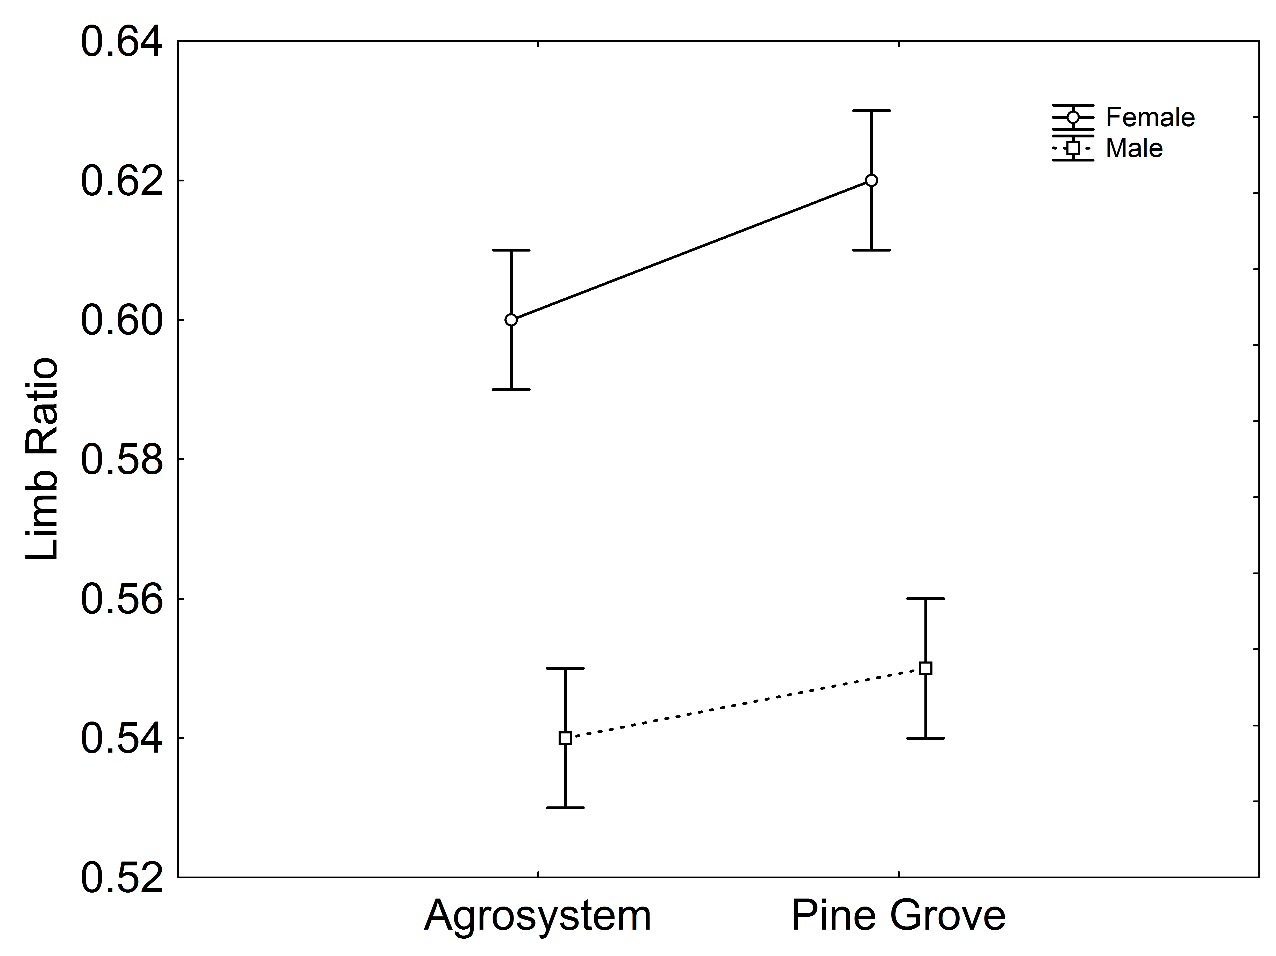


**Fig. S1e**

**
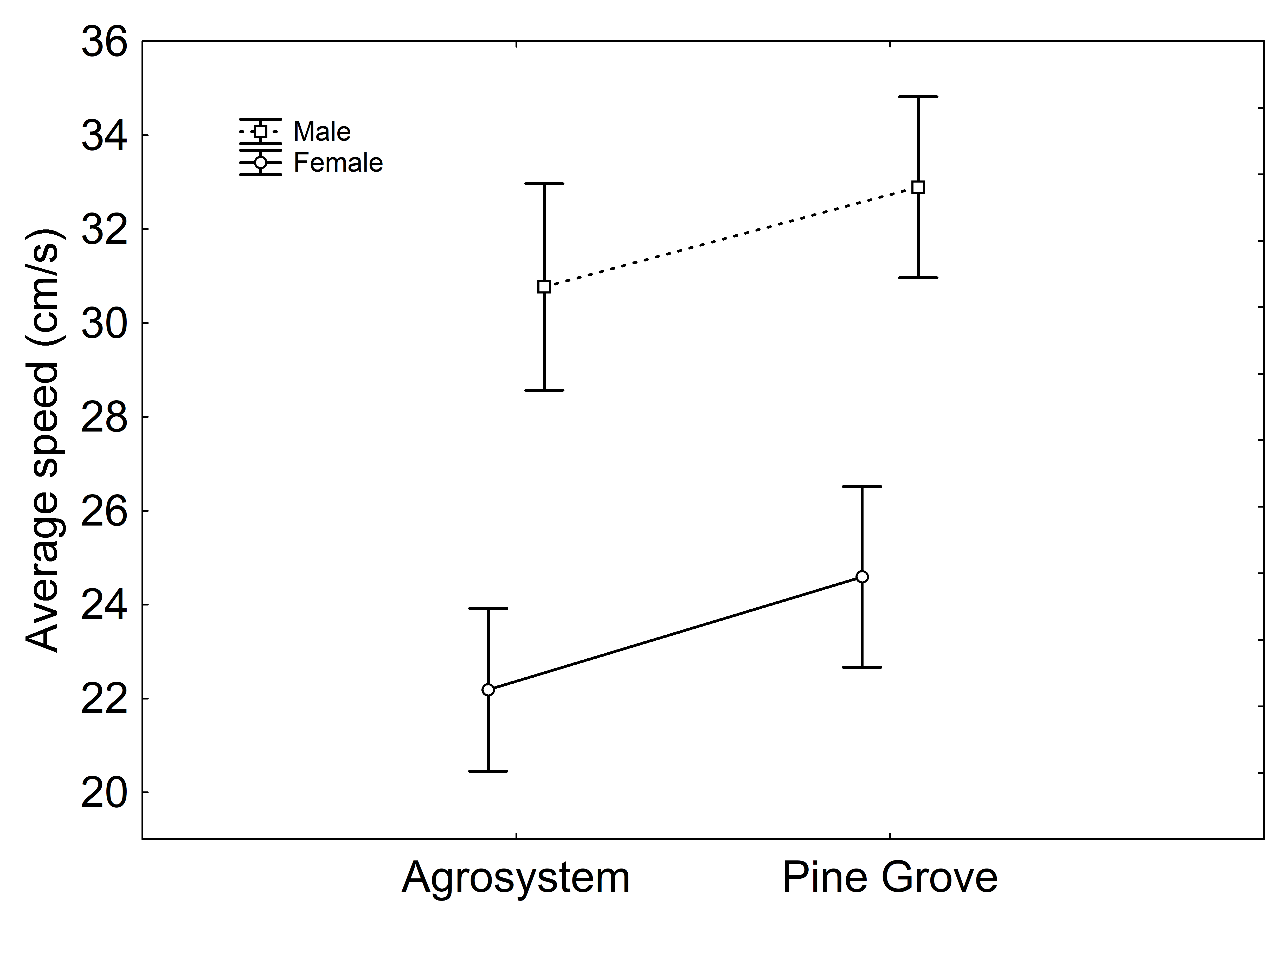
**

**Fig. S1f**

**Fig. S1.** Sex and habitat differences in body mass (Fig. S1a), SVL (Fig. S1b), fore limb length (Fig. S1c), hind limb length (Fig. S1d), limb ratio (Fig. S1e), and average speed (Fig. S1f). Fore and hind limb length were controlled for SVL. Sample sizes are indicated in Fig. S1a. Vertical bars represent standard errors.
